# Supplementary material for: Membrane processes for the reuse of car washing wastewater
Source: Oxford University Press journal article supplement (doi:10.2166/wrd.2017.036), 2017-10-26
Supplement: wrd2017036supp.doc [file wrd2017036supp.doc]

SUPPLEMENTARY MATERIAL FIGURE CAPTIONS


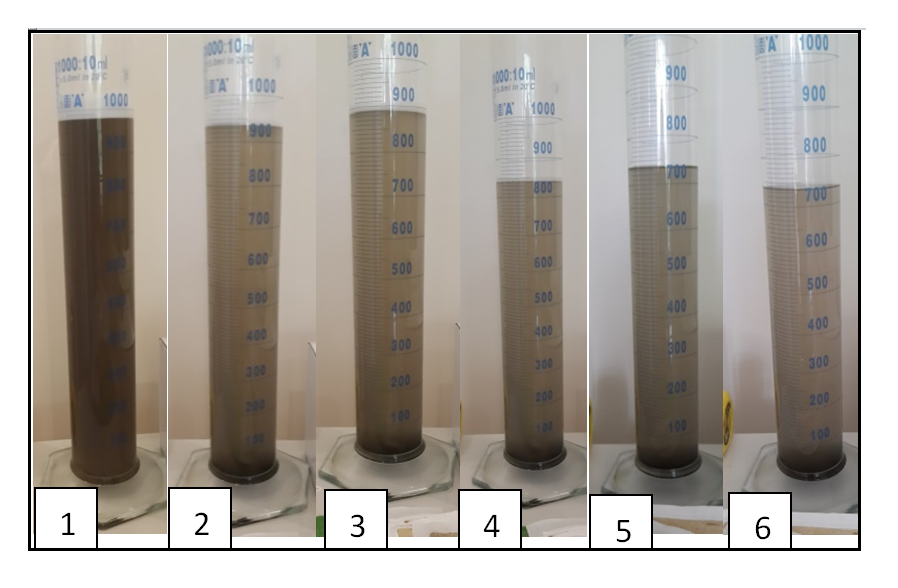


Figure S1. Precipitation test: (1) test start; (2) 40 minutes; (3) 60 minutes; (4) 90 minutes; (5) 120 minutes; (6) 180 minutes.


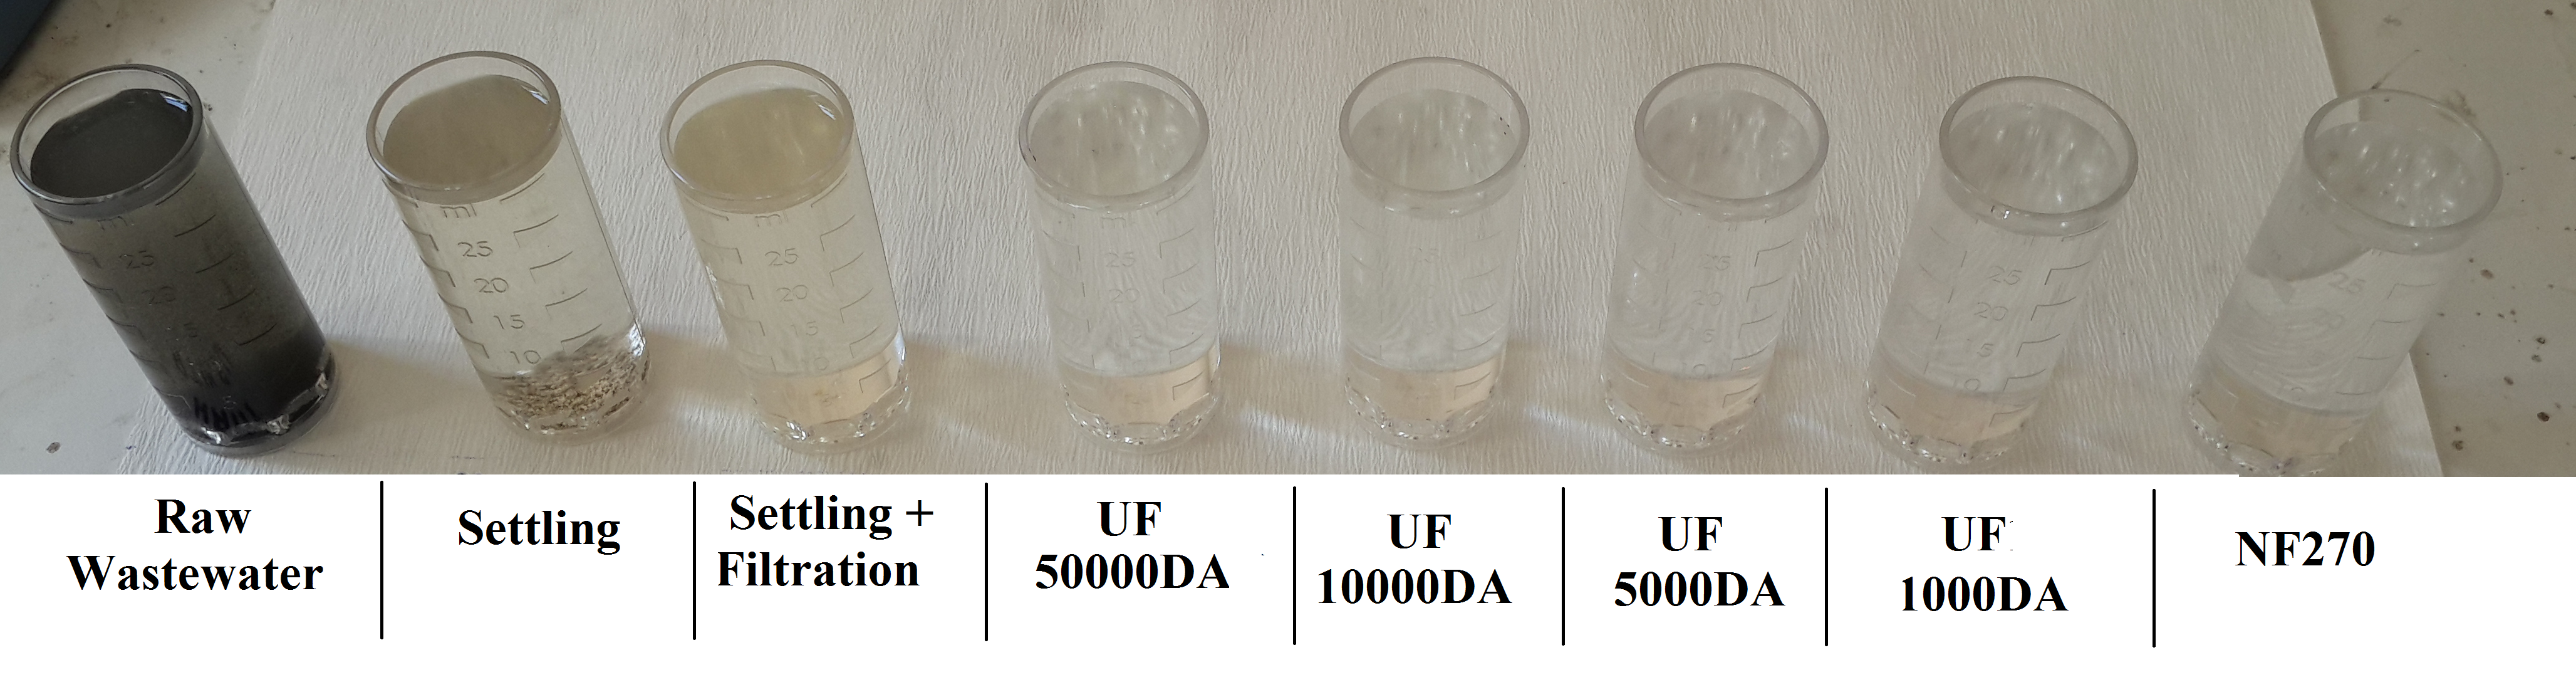


Figure S2. Raw wastewater, pre-treatment effluent and membrane filtration effluents for car wash wastewater.


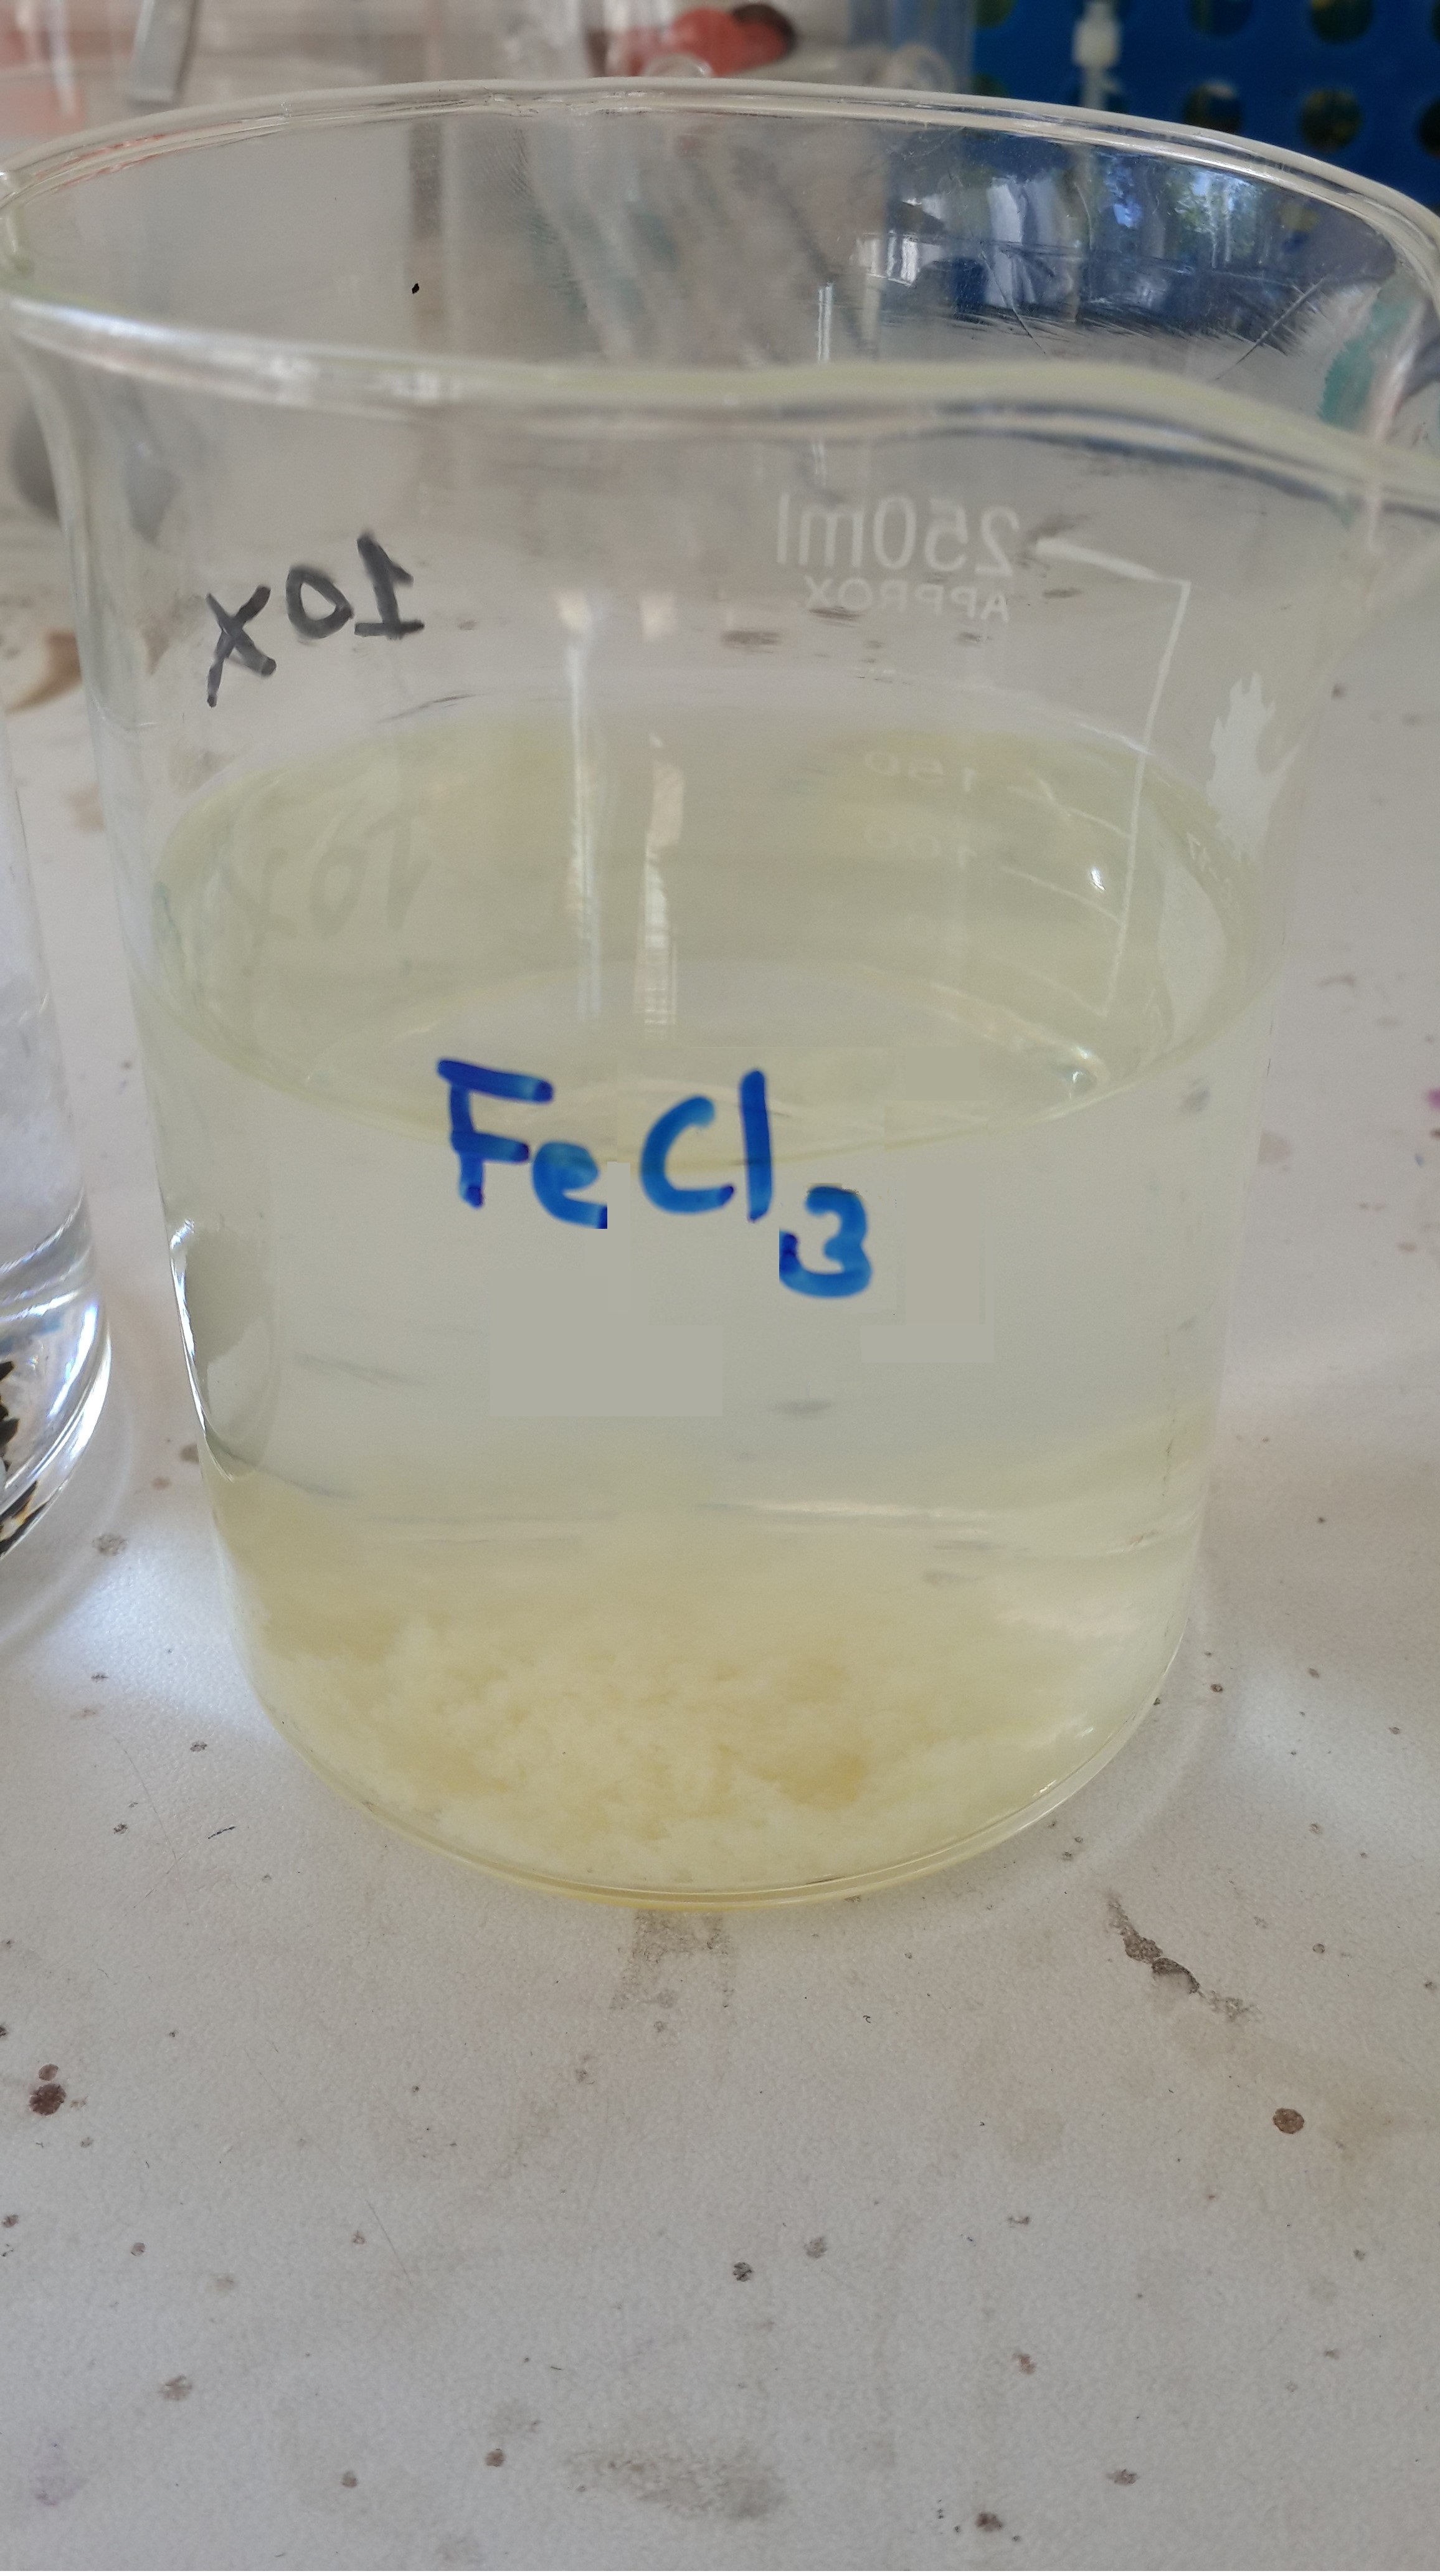


Figure S3. Precipitation image taken at the end of precipitation test with FeCl3. Decrease in the amount of detergent after precipitation was confirmed by the COD test.
